# Supplementary material
Source: publisher figshare collection journal article supplement (https://sage.figshare.com/ndownloader/files/18667256)
Supplement: Supplementary file 1 [file 18667256]

| No. | Author                                       | Year | Title                                                                                         | Entrepreneurship Stream | Articulated Mechanisms (first-order codes)                                                                                               | Condensed Mechanisms (second-order themes)                                                                         | Mechanism Category | Implicit/Explicit    |
|-----|----------------------------------------------|------|-----------------------------------------------------------------------------------------------|-------------------------|------------------------------------------------------------------------------------------------------------------------------------------|--------------------------------------------------------------------------------------------------------------------|--------------------|----------------------|
| 1   | Giovanni, A.; Giuliano, N.                   | 1998 | Seeing ecology and "green" innovations as a source of change                                  | Environmental           | Identify opportunities out of growing importance for ecological issues                                                                   | Discovering sustainability-oriented opportunities                                                                  | AF-micro           | Implicit             |
| 2   | Keogh, P. D.; Polonsky, M. J.                | 1998 | Environmental commitment: A basis for environmental entrepreneurship?                         | Environmental           | Environmental entrepreneurship centers itself on a vision to reduce environmental impact through its main business activities            | Developing venture with sustainability values at the core                                                          | AF-micro           | Implicit             |
| 3   | Pastakia, A.                                 | 1998 | Grassroots ecopreneurs: Change agents for a sustainable society                               | Environmental           | Restrictive legal environments prohibit entrepreneurial activity in ecological areas                                                     | Institutions constraining sustainability-oriented enterprise                                                       | S-macro            | Explicit             |
|     |                                              |      |                                                                                               |                         | Market fails to deal with negative environmental externalities                                                                           | Market failure causing environmental and social impairment                                                         | S-meso             | Explicit             |
|     |                                              |      |                                                                                               |                         | Markets resist to switch to alternative (ecological) products                                                                            | Markets resisting sustainability-oriented activities                                                               | S-meso             | Explicit             |
|     |                                              |      |                                                                                               |                         | Eco-friendliness of products or processes main driver in venture development<br>Ecopreneurs popularize eco-friendly ideas or innovations | Developing venture with sustainability values at the core<br>Presenting sustainability-oriented market innovations | AF-micro<br>T-meso | Implicit<br>Explicit |
| 4   | Hart, S.L.; Milstein, M.B.                   | 1999 | Global sustainability and the creative destruction of industries                              | Sustainable             | Opportunities emerge in changing, shifting economies; external enablers provide impetus for opportunities                                | Discovering sustainability-oriented opportunities                                                                  | AF-meso            | Implicit             |
|     |                                              |      |                                                                                               |                         | Emerging sustainability technologies replace old products and markets                                                                    | Presenting sustainability-oriented market innovations                                                              | T-meso             | Implicit             |
| 5   | Larson, A.L                                  | 2000 | Sustainable Innovation Through An Entrepreneurship Lens                                       | Sustainable             | Opportunity recognition of niche markets for sustainability-oriented businesses                                                          | Discovering sustainability-oriented opportunities                                                                  | AF-micro           | Explicit             |
|     |                                              |      |                                                                                               |                         | Value-driven conception of the venture right from the start                                                                              | Developing venture with sustainability values at the core                                                          | AF-micro           | Explicit             |
|     |                                              |      |                                                                                               |                         | Market and supply chain innovation in order to bring the product to market                                                               | Presenting sustainability-oriented market innovations                                                              | T-meso             | Implicit             |
| 6   | Thompson, J., A. G.; Lees, A.                | 2000 | Social entrepreneurship – a new look at the people and the potential                          | Social                  | Individual entrepreneurs vision for social needs                                                                                         | Discovering sustainability-oriented opportunities                                                                  | AF-micro           | Implicit             |
|     |                                              |      |                                                                                               |                         | Creating social services to serve the local communities                                                                                  | Creating local value                                                                                               | T-meso             | Implicit             |
| 7   | Isaak, R.                                    | 2002 | The making of the ecopreneur                                                                  | Environmental           | Some public policy strategies encourage ecopreneurship                                                                                   | Institutions supporting sustainability-oriented enterprise                                                         | S-macro            | Implicit             |
| 8   | Keijzers, G.                                 | 2002 | The transition to the sustainable enterprise                                                  | Sustainable             | Due to market failures, opportunities through environmental protection emerge                                                            | Market failure causing environmental and social impairment                                                         | S-meso             | Implicit             |
|     |                                              |      |                                                                                               |                         | Introduction of ecologically and economically superior products and purely 'green' products                                              | Presenting sustainability-oriented market innovations                                                              | T-meso             | Implicit             |
| 9   | Linnanen, L.                                 | 2002 | An insider's experiences with environmental entrepreneurship                                  | Environmental           | Opportunity recognition of eco-friendly products and services                                                                            | Discovering sustainability-oriented opportunities                                                                  | AF-micro           | Implicit             |
| 10  | Schaltegger, S.                              | 2002 | A framework for ecopreneurship: Leading bioneers and environmental managers to ecopreneurship | Environmental           | Sustainable development requires sustainable innovations to achieve environmental goals                                                  | Presenting sustainability-oriented market innovations                                                              | T-meso             | Implicit             |
| 11  | Schaper, M.                                  | 2002 | The essence of ecopreneurship                                                                 | Environmental           | Enterprising individuals wreak change in market systems; entrepreneurs as "engines of change"                                            | Transforming markets towards sustainable development                                                               | T-meso             | Implicit             |
| 12  | Volery, T.                                   | 2002 | An Entrepreneur Commercialises Conservation                                                   | Environmental           | Personal values (strong green values) shapes entrepreneurial venture                                                                     | Developing venture with sustainability values at the core                                                          | AF-micro           | Implicit             |
| 13  | Walley, E.E.; Taylor, D.W.                   | 2002 | Opportunists, Champions, Mavericks...? A Typology of Green Entrepreneurs                      | Environmental           | Ecological orientation as a perceived market opportunity and/or motivation.                                                              | Discovering sustainability-oriented opportunities                                                                  | AF-micro           | Implicit             |
| 14  | Alvord, S.H.; Brown, L.D.; Letts, C.W.       | 2004 | Social Entrepreneurship and Societal Transformation: An Exploratory Study                     | Social                  | The capacity to work with and build bridges among very diverse stakeholders.                                                             | Partnering with stakeholders                                                                                       | AF-micro           | Implicit             |
| 15  | Roper, J.; Cheney, G.                        | 2005 | The meanings of social entrepreneurship today                                                 | Social                  | Value-driven and charismatic leadership                                                                                                  | Developing venture with sustainability values at the core                                                          | AF-micro           | Implicit             |
|     |                                              |      |                                                                                               |                         | Acting boldly without being limited to existing resources                                                                                | Mobilizing resources                                                                                               | AF-micro           | Implicit             |
| 16  | Seelos, C.; Mair, J.                         | 2005 | Social entrepreneurship: Creating new business models to serve the poor                       | Social                  | Bringing forth new social and environmental business models                                                                              | Presenting sustainability-oriented market innovations                                                              | T-meso             | Implicit             |
|     |                                              |      |                                                                                               |                         | Create local social solutions                                                                                                            | Creating local value                                                                                               | T-meso             | Implicit             |
|     |                                              |      |                                                                                               |                         | Improving institutional systems and create new solutions                                                                                 | Transforming institutions towards sustainable development                                                          | T-macro            | Implicit             |
| 17  | Austin, J.; Stevenson, H.; Wei- Skillern, J. | 2006 | Social and commercial entrepreneurship: Same, different, or both?                             | Social                  | Contextual forces affecting the business                                                                                                 | Institutions constraining sustainability-oriented enterprise                                                       | S-macro            | Implicit             |
|     |                                              |      |                                                                                               |                         | Addressing social needs arising from market failure                                                                                      | Market failure causing environmental and social impairment                                                         | S-meso             | Implicit             |
|     |                                              |      |                                                                                               |                         | focus on social value proposition                                                                                                        | Developing venture with sustainability values at the core                                                          | AF-micro           | Explicit             |
|     |                                              |      |                                                                                               |                         | Challenge of procuring resources can become primary focus                                                                                | Mobilizing resources                                                                                               | AF-micro           | Implicit             |
| 18  | Cohen, B.                                    | 2006 | Sustainable valley entrepreneurial ecosystems                                                 | Sustainable             | Venture as a vehicle for creating social value                                                                                           | Creating large-scale value                                                                                         | T-macro            | Explicit             |
|     |                                              |      |                                                                                               |                         | Entrepreneurial ecosystem's strength may be even more critical than previous recognized                                                  | Markets supporting sustainability-oriented enterprise                                                              | S-meso             | Implicit             |
| 19  | Mair, J.; Marti, I.                          | 2006 | Social entrepreneurship research: A source of explanation, prediction, and delight            | Social                  | Pursue opportunities to create social value for social change or meeting social needs                                                    | Discovering sustainability-oriented opportunities                                                                  | AF-micro           | Explicit             |
|     |                                              |      |                                                                                               |                         | Combination of resources<br>Social value creation                                                                                        | Mobilizing resources<br>Creating local value                                                                       | AF-micro<br>T-meso | Implicit<br>Explicit |
| 20  | Peredo, A. M.; McLean, M.                    | 2006 | Social entrepreneurship: A critical review of the concept                                     | Social                  | Recognizing and exploiting opportunities for social value                                                                                | Discovering sustainability-oriented opportunities                                                                  | AF-micro           | Implicit             |
| 21  | Stryjan, Y.                                  | 2006 | The practice of social entrepreneurship: Theory and the Swedish experience                    | Social                  | Unmet needs that the state welfare system will not or cannot meet                                                                        | Institutions prompting unmet social needs                                                                          | S-macro            | Implicit             |
|     |                                              |      |                                                                                               |                         | ingenuous ways of assembling and utilizing available resources to form enterprises,                                                      | Mobilizing resources                                                                                               | AF-micro           | Implicit             |
| 22  | Cohen, B.; Winn, M. I.                       | 2007 | Market imperfections, opportunity and sustainable entrepreneurship                            | Environmental           | Industry is viewed as one of the largest contributors to environmental degradation                                                       | Institutions degrading the natural environment                                                                     | S-macro            | Explicit             |
|     |                                              |      |                                                                                               |                         | Market imperfections contribute to environmental degradation                                                                             | Market failure causing environmental and social impairment                                                         | S-meso             | Explicit             |
|     |                                              |      |                                                                                               |                         | Powerful design principle to spark entrepreneurial opportunity is biomimicry                                                             | Discovering sustainability-oriented opportunities                                                                  | AF-micro           | Implicit             |
|     |                                              |      |                                                                                               |                         | Entrepreneurial innovations help to solve environmental challenges                                                                       | Presenting sustainability-oriented market innovations                                                              | T-meso             | Implicit             |

| No. | Author                                                                     | Year | Title                                                                                                              | Entrepreneurship Stream | Articulated Mechanisms (first-order codes)                                                               | Condensed Mechanisms (second-order themes)                 | Mechanism Category | Implicit/Explicit |
|-----|----------------------------------------------------------------------------|------|--------------------------------------------------------------------------------------------------------------------|-------------------------|----------------------------------------------------------------------------------------------------------|------------------------------------------------------------|--------------------|-------------------|
| 23  | Dean, T. J.; McMullen, J. S.                                               | 2007 | Toward a theory of sustainable entrepreneurship: Reducing environmental degradation through entrepreneurial action | Environmental           | Existing market structure degrading natural environment                                                  | Institutions degrading the natural environment             | S-macro            | Explicit          |
|     |                                                                            |      |                                                                                                                    |                         | Market failures described in five categories                                                             | Market failure causing environmental and social impairment | S-meso             | Explicit          |
|     |                                                                            |      |                                                                                                                    |                         | Creating solutions to overcome market failures                                                           | Transforming markets towards sustainable development       | T-meso             | Explicit          |
| 24  | Dixon, S. E. A.; Clifford, A.                                              | 2007 | Ecopreneurship - A new approach to managing the triple bottom line                                                 | Sustainable             | Entrepreneurs embedded in social, environmental and regulatory system                                    | Institutions supporting sustainability-oriented enterprise | AF-micro           | Implicit          |
|     |                                                                            |      |                                                                                                                    |                         | Idealistic values can be translated into valuable economic assets                                        | Developing venture with sustainability values at the core  | AF-micro           | Explicit          |
| 25  | Haugh, H.                                                                  | 2007 | New Strategies for a Sustainable Society: The Growing Contribution of Social Entrepreneurship                      | Social                  | Combining business purpose with social and environmental outcomes                                        | Successive balancing                                       | AF-micro           | Implicit          |
|     |                                                                            |      |                                                                                                                    |                         | Mission-centric, embedded social enterprises                                                             | Developing venture with sustainability values at the core  | AF-micro           | Implicit          |
| 26  | Hofstra, N.                                                                | 2007 | Sustainable entrepreneurship in dialogue                                                                           | Sustainable             | Transform environmental and social threats into opportunities                                            | Discovering sustainability-oriented opportunities          | AF-micro           | Implicit          |
| 27  | Martin, R.; Osberg, S.                                                     | 2007 | Social Entrepreneurship: the case for definition                                                                   | Social                  | Successful entrepreneurship encourages sustainable creative destruction                                  | Presenting sustainability-oriented market innovations      | T-meso             | Implicit          |
| 28  | Shaw, E.; Carter, S.                                                       | 2007 | Social entrepreneurship: Theoretical antecedents and empirical analysis of entrepreneurial processes and outcomes  | Social                  | Opportunity recognition                                                                                  | Discovering sustainability-oriented opportunities          | AF-micro           | Implicit          |
|     |                                                                            |      |                                                                                                                    |                         | Social issues (local needs) are brought to light in communities                                          | Local actors prompting social needs                        | S-meso             | Implicit          |
|     |                                                                            |      |                                                                                                                    |                         | Network of companies/ cooperation leading social change                                                  | Collective actions leading to transitions                  | AF-meso            | Implicit          |
| 29  | Austin, J.E.; Leonard, H.B.                                                | 2008 | Can the virtuous mouse and the wealthy elephant live happily ever after?                                           | Social                  | Merging and combining resources to achieve great market impact                                           | Co-evolving between market actors                          | AF-meso            | Implicit          |
| 30  | Choi, D. Y.; Gray, E. R.                                                   | 2008 | Socially responsible entrepreneurs: What do they do to create and build their companies?                           | Sustainable             | Build a strong value-centered organizational culture                                                     | Developing venture with sustainability values at the core  | AF-micro           | Explicit          |
|     |                                                                            |      |                                                                                                                    |                         | Acquisition of needed resources as key element in a company's growth                                     | Mobilizing resources                                       | AF-micro           | Explicit          |
|     |                                                                            |      |                                                                                                                    |                         | Emphasis on personal values in employee selection process                                                | Cultivating sustainability-oriented venture                | AF-micro           | Explicit          |
|     |                                                                            |      |                                                                                                                    |                         | Being a role model for other companies                                                                   | Presenting sustainability-oriented market innovations      | T-meso             | Explicit          |
|     |                                                                            |      |                                                                                                                    |                         | Minimizing negative and increasing positive social or environmental impacts                              | Creating large-scale value                                 | T-macro            | Implicit          |
| 31  | Choi, D. Y; Gray, E.R.                                                     | 2008 | The venture development processes of "sustainable entrepreneurs                                                    | Sustainable             | Opportunity identification                                                                               | Discovering sustainability-oriented opportunities          | AF-micro           | Explicit          |
|     |                                                                            |      |                                                                                                                    |                         | Value promotion and concept development                                                                  | Developing venture with sustainability values at the core  | AF-micro           | Explicit          |
|     |                                                                            |      |                                                                                                                    |                         | Bootstrapping, acquisition of resources                                                                  | Mobilizing resources                                       | AF-micro           | Explicit          |
|     |                                                                            |      |                                                                                                                    |                         | Profitability/ Growth/scaling                                                                            | Cultivating sustainability-oriented venture                | AF-micro           | Implicit          |
|     |                                                                            |      |                                                                                                                    |                         | Balancing the dimensions                                                                                 | Successive balancing                                       | AF-micro           | Explicit          |
| 32  | Cohen, B.; Smith, B.; Mitchell, R.                                         | 2008 | Toward a sustainable conceptualization of dependent variables in entrepreneurship research                         | Sustainable             | First-order strategic planning                                                                           | Discovering sustainability-oriented opportunities          | AF-micro           | Implicit          |
|     |                                                                            |      |                                                                                                                    |                         | Ethical decisions making                                                                                 | Developing venture with sustainability values at the core  | AF-micro           | Implicit          |
|     |                                                                            |      |                                                                                                                    |                         | Creation of new sustainable industries                                                                   | Presenting sustainability-oriented market innovations      | T-meso             | Implicit          |
| 33  | Monllor, J.; Attaran, S.                                                   | 2008 | Opportunity recognition of social entrepreneurs: An application of the creativity model                            | Social                  | Opportunity is in the mind of individual                                                                 | Discovering sustainability-oriented opportunities          | AF-micro           | Implicit          |
| 34  | Rhodes, M.L.; Donnelly-Cox, G.                                             | 2008 | Social Entrepreneurship as a Performance Landscape: The Case of 'Front Line.'                                      | Social                  | Ventures characterized by their social mission that is served by a distinctive social method             | Developing venture with sustainability values at the core  | AF-micro           | Implicit          |
| 35  | Townsend, D. M.; Hart, T. A.                                               | 2008 | Perceived institutional ambiguity and the choice of organizational form in social entrepreneurial ventures         | Social                  | Institutions reduce cognitive uncertainty by providing socially rationalized rules                       | Institutions supporting sustainability-oriented enterprise | S-macro            | Implicit          |
|     |                                                                            |      |                                                                                                                    |                         | Mix of social and economic value creation                                                                | Creating local value                                       | T-meso             | Implicit          |
| 36  | Zahra, S. A.; Rawhouser, H. N. ; Bhawe, N.; Neubaum, D. O. ; Hayton, J. C. | 2008 | Globalization of social entrepreneurship opportunities                                                             | Social                  | Environmental/ social degradation                                                                        | Institutions degrading the natural environment             | S-macro            | Implicit          |
|     |                                                                            |      |                                                                                                                    |                         | Market imperfections create disequilibria in social services                                             | Market failure causing environmental and social impairment | S-meso             | Implicit          |
|     |                                                                            |      |                                                                                                                    |                         | Technological advances allow new ventures to emerge                                                      | Logic hybridization leading to field-level change          | AF-meso            | Implicit          |
| 37  | Gibbs, D.                                                                  | 2009 | Sustainability entrepreneurs, ecopreneurs and the development of a sustainable economy                             | Sustainable             | Addressing global warming, climate change and associated negative environmental impacts                  | Institutions degrading the natural environment             | S-macro            | Implicit          |
|     |                                                                            |      |                                                                                                                    |                         | Environmental solutions and innovations influence mass market                                            | Transforming markets towards sustainable development       | T-meso             | Implicit          |
|     |                                                                            |      |                                                                                                                    |                         | New form of a capitalist development                                                                     | Transforming markets towards sustainable development       | T-meso             | Implicit          |
| 38  | Mair, J.; Marti, I.                                                        | 2009 | Entrepreneurship in and around institutional voids: A case study from Bangladesh                                   | Social                  | Institutional voids may prevent access to and participation in markets                                   | Markets resisting sustainability-oriented enterprise       | S-meso             | Implicit          |
|     |                                                                            |      |                                                                                                                    |                         | Bricolage as way entrepreneurs mobilize resources                                                        | Mobilizing resources                                       | AF-micro           | Explicit          |
| 39  | Murphy, P. J.; Coombes, S. M.                                              | 2009 | A model of social entrepreneurial discovery                                                                        | Social                  | Social entrepreneurial opportunities derive from emergent needs or longstanding inefficiencies           | Discovering sustainability-oriented opportunities          | AF-micro           | Implicit          |
|     |                                                                            |      |                                                                                                                    |                         | Achieving constructive social change; Boosting social value                                              | Creating local value                                       | T-meso             | Implicit          |
| 40  | Neck, H.; Brush, C.; Allen, E.                                             | 2009 | The landscape of social entrepreneurship                                                                           | Sustainable             | Opportunities arise from social problems (people) and presented in market failures and social impairment | Market failure causing environmental and social impairment | S-meso             | Implicit          |
| 41  | O'Neill Jr. , G. D.; Hershauer, J. C.; Golden, J. S.                       | 2009 | The cultural context of sustainability entrepreneurship                                                            | Social                  | Stakeholder value network as contributors and beneficiaries                                              | Partnering with stakeholders                               | AF-micro           | Implicit          |
|     |                                                                            |      |                                                                                                                    |                         | The holistic economic–environmental–social system is transformed towards sustainability                  | Transforming institutions towards sustainable development  | T-macro            | Implicit          |
|     |                                                                            |      |                                                                                                                    |                         |                                                                                                          |                                                            |                    |                   |
| 42  | Parrish, B. D.; Foxon, T. J.                                               | 2009 | Sustainability entrepreneurship and equitable transitions to a low-carbon economy                                  | Sustainable             | Institutions degrading environment                                                                       | Institutions degrading the natural environment             | S-macro            | Explicit          |
|     |                                                                            |      |                                                                                                                    |                         | Institutions decreasing social well-being                                                                | Institutions prompting unmet social needs                  | S-macro            | Explicit          |
|     |                                                                            |      |                                                                                                                    |                         | ‘Lock-in’ of the established markets prevent further sustainability solutions.                           | Markets resisting sustainability-oriented enterprise       | S-meso             | Implicit          |
|     |                                                                            |      |                                                                                                                    |                         | Interaction between actors, networks and institutions leading to sustainability-oriented transitions.    | Collective actions leading to transitions                  | AF-meso            | Explicit          |
|     |                                                                            |      |                                                                                                                    |                         | Creation of new institutional conventions to overcome limitations.                                       | Creating sustainability-oriented institutions              | T-macro            | Explicit          |

| No. | Author                                                       | Year | Title                                                                                                                               | Entrepreneurship Stream | Articulated Mechanisms (first-order codes)                                                                                                                                                         | Condensed Mechanisms (second-order themes)                     | Mechanism Category | Implicit/Explicit |
|-----|--------------------------------------------------------------|------|-------------------------------------------------------------------------------------------------------------------------------------|-------------------------|----------------------------------------------------------------------------------------------------------------------------------------------------------------------------------------------------|----------------------------------------------------------------|--------------------|-------------------|
| 42  | Parrish, B. D.; Foxon, T. J. (cont.)                         | 2009 | Sustainability entrepreneurship and equitable transitions to a low-carbon economy                                                   | Sustainable             | Variation in existing institutional structures                                                                                                                                                     | Transforming institutions towards sustainable development      | T-macro            | Implicit          |
|     |                                                              |      |                                                                                                                                     |                         | Contributing to improved environmental quality and social well-being                                                                                                                               | Creating large-scale value                                     | T-macro            | Implicit          |
| 43  | Schlange, L.                                                 | 2009 | Stakeholder Identification in Sustainability Entrepreneurship: The Role of Managerial and Organisational Cognition                  | Sustainable             | Entrepreneurial cognition linked to opportunity recognition in all three dimensions: economic, ecological and social                                                                               | Discovering sustainability-oriented opportunities              | AF-micro           | Implicit          |
|     |                                                              |      |                                                                                                                                     |                         | Entrepreneurs develop a network of salient social contacts                                                                                                                                         | Partnering with stakeholders                                   | AF-micro           | Implicit          |
| 44  | Short, Jeremy C.; Moss, Todd W.; Lumpkin, G. T.              | 2009 | Research in social entrepreneurship: past contributions and future opportunities                                                    | Social                  | Opportunity discovery                                                                                                                                                                              | Discovering sustainability-oriented opportunities              | AF-micro           | Explicit          |
|     |                                                              |      |                                                                                                                                     |                         | Social value creation                                                                                                                                                                              | Creating local value                                           | T-meso             | Explicit          |
|     |                                                              |      |                                                                                                                                     |                         | Environmental and social solutions on global scale                                                                                                                                                 | Creating large-scale value                                     | T-macro            | Implicit          |
| 45  | Sine, W.; Lee, B.H.                                          | 2009 | Tilting at Windmills? The Environmental Movement and the Emergence of the U.S. Wind Energy Sector                                   | Environmental           | Environmental social movement organizations stage lobbying campaigns directed toward state governments and regulators that indirectly increased entrepreneurial activity in the wind power sector. | Social movements empowering sustainability-oriented enterprise | S-meso             | Explicit          |
| 46  | Sud, M.; Vansandt, C. V.; Baugous, A. M.                     | 2009 | Social entrepreneurship: The role of institutions                                                                                   | Social                  | Explore and exploit opportunities in sustainable manner, seizing opportunities that others miss                                                                                                    | Discovering sustainability-oriented opportunities              | AF-micro           | Implicit          |
|     |                                                              |      |                                                                                                                                     |                         | Creation of social value for multiple actors in local spheres                                                                                                                                      | Creating local value                                           | T-meso             | Explicit          |
| 47  | Tilley, F.; Young, W.                                        | 2009 | Sustainability entrepreneurs: Could they be the true wealth generators of the future?                                               | Sustainable             | Wealth generation for all three dimensions for sustainable development                                                                                                                             | Creating large-scale value                                     | T-macro            | Implicit          |
| 48  | Young, W.; Tilley, F.                                        | 2009 | Can businesses move beyond efficiency? The shift toward effectiveness and equity in the corporate sustainability debate             | Sustainable             | Growing recognition of social and environmental issues provides new opportunities                                                                                                                  | Discovering sustainability-oriented opportunities              | AF-micro           | Implicit          |
|     |                                                              |      |                                                                                                                                     |                         | Introducing new sustainability innovations (products and processes)                                                                                                                                | Presenting sustainability-oriented market innovations          | T-meso             | Implicit          |
| 49  | Zahra, S. A.; Gedajlovic, E.; Neubaum, D. O.; Shulman, J. M. | 2009 | A typology of social entrepreneurs: Motives, search processes and ethical challenges                                                | Social                  | Recognizing and addressing social needs                                                                                                                                                            | Discovering sustainability-oriented opportunities              | AF-micro           | Implicit          |
|     |                                                              |      |                                                                                                                                     |                         | Addressing needs that governments, agencies and businesses cannot                                                                                                                                  | Market failure causing environmental and social impairment     | S-meso             | Implicit          |
| 50  | Chell, E.; Nicolopoulou, K.; Karatas-Özkan, M.               | 2010 | Social entrepreneurship and enterprise: International and innovation perspectives                                                   | Social                  | Enabling environment for social enterprises                                                                                                                                                        | Institutions supporting sustainability-oriented enterprise     | S-macro            | Implicit          |
|     |                                                              |      |                                                                                                                                     |                         | Activities and processes undertaken to discover, define and exploit opportunities in order to enhance social wealth                                                                                | Discovering sustainability-oriented opportunities              | AF-micro           | Explicit          |
|     |                                                              |      |                                                                                                                                     |                         | Resource mobilization                                                                                                                                                                              | Mobilizing resources                                           | AF-micro           | Explicit          |
|     |                                                              |      |                                                                                                                                     |                         | Collaborating with diverse stakeholders                                                                                                                                                            | Partnering with stakeholders                                   | AF-micro           | Explicit          |
| 51  | Dacin, P.; Dacin, M.; Matear, M.                             | 2010 | Social entrepreneurship: Why we don't need a new theory and how we move forward from here                                           | Social                  | Creativity and alertness to opportunity                                                                                                                                                            | Discovering sustainability-oriented opportunities              | AF-micro           | Implicit          |
|     |                                                              |      |                                                                                                                                     |                         | Bricolage as key driver for value creation                                                                                                                                                         | Creating local value                                           | S-meso             | Explicit          |
| 52  | Di Domenico, M.; Haugh, H.; Tracey                           | 2010 | Social bricolage: Theorizing social value creation in social enterprises                                                            | Social                  | <i>Social bricolage as a unifying concept for several mechanisms below:</i>                                                                                                                        |                                                                |                    |                   |
|     |                                                              |      |                                                                                                                                     |                         | Entrepreneurs in resource-poor environments recombine elements at hand for new purposes                                                                                                            | Mobilizing resources                                           | AF-micro           | Explicit          |
|     |                                                              |      |                                                                                                                                     |                         | Persuading stakeholders to leverage resources for the enterprise                                                                                                                                   | Partnering with stakeholders                                   | AF-micro           | Explicit          |
|     |                                                              |      |                                                                                                                                     |                         | Inventing or creating resources: providing products or services that would otherwise be unavailable                                                                                                | Presenting sustainability-oriented market innovations          | T-meso             | Explicit          |
|     |                                                              |      |                                                                                                                                     |                         | Creating something from nothing for a social end                                                                                                                                                   | Creating local value                                           | T-meso             | Explicit          |
| 53  | Hall, Jeremy K.; Daneke, Gregory A.; Lenox, Michael J.       | 2010 | Sustainable development and entrepreneurship: Past contributions and future directions                                              | Sustainable             | Entrepreneurship as a panacea for many social and environmental concerns                                                                                                                           | Creating large-scale value                                     | T-macro            | Explicit          |
| 54  | El Harbi, S.; Anderson, A.; Ammar, S.H.                      |      | Entrepreneurs and the environment: Towards a typology of Tunisian ecopreneurs                                                       | Environmental           | Market failures and imperfections are the sea from which opportunities are drawn                                                                                                                   | Market failure causing environmental and social impairment     | S-meso             | Implicit          |
|     |                                                              |      |                                                                                                                                     |                         | Possibilities of identifying potential opportunities in the environmental field                                                                                                                    | Discovering sustainability-oriented opportunities              | AF-micro           | Implicit          |
| 55  | Hill, T. L.; Kothari, T. H.; Shea, M.                        | 2010 | Patterns of meaning in the social entrepreneurship literature: A research platform                                                  | Social                  | Management of social networks, especially their involvement in enterprise development.                                                                                                             | Partnering with stakeholders                                   | AF-micro           | Implicit          |
| 56  | Hockerts, K.; Wüstenhagen, R.                                | 2010 | Greening Goliaths versus emerging Davids - Theorizing about the role of incumbents and new entrants in sustainable entrepreneurship | Sustainable             | Incumbents react to activities of new entrants                                                                                                                                                     | Co-evolving between market actors                              | AF-meso            | Implicit          |
|     |                                                              |      |                                                                                                                                     |                         | New entrants are more likely to pursue sustainability-related opportunities                                                                                                                        | Developing venture with sustainability values at the core      | AF-micro           | Implicit          |
|     |                                                              |      |                                                                                                                                     |                         | Incremental CSR activities can result in transformation of an industry                                                                                                                             | Transforming markets towards sustainable development           | T-meso             | Implicit          |
|     |                                                              |      |                                                                                                                                     |                         | Social innovation; product or process innovations with social purpose                                                                                                                              | Presenting sustainability-oriented market innovations          | T-macro            | Implicit          |
| 57  | Kirkwood, J.; Walton, S.                                     | 2010 | What motivates ecopreneurs to start businesses?                                                                                     | Env Only                | Entrepreneurs recognizing opportunities as consumer demand grows for more eco-friendly products and service                                                                                        | Discovering sustainability-oriented opportunities              | AF-micro           | Explicit          |
| 58  | Kuckertz, A.; Wagner, M.                                     | 2010 | The influence of sustainability orientation on entrepreneurial intentions — Investigating the role of business experience           | Sustainable             | Entrepreneurial education can encourage the exploitation of opportunities for sustainable entrepreneurship                                                                                         | Institutions supporting sustainability-oriented enterprise     | S-macro            | Implicit          |
|     |                                                              |      |                                                                                                                                     |                         | Overall industrial policy influences desirability of sustainability entrepreneurship                                                                                                               | Markets supporting sustainability-oriented enterprise          | S-meso             | Implicit          |
|     |                                                              |      |                                                                                                                                     |                         | Individual sustainability orientation can explain entrepreneurial intention                                                                                                                        | Developing venture with sustainability values at the core      | AF-micro           | Implicit          |
|     |                                                              |      |                                                                                                                                     |                         | Business experience influences sustainability orientation                                                                                                                                          | Developing venture with sustainability values at the core      | AF-micro           | Implicit          |
| 59  | Meek, W. R.; Pacheco, D. F.; York, J. G.                     | 2010 | The impact of social norms on entrepreneurial action: Evidence from the environmental entrepreneurship context                      | Environmental           | Public, state-sponsored incentives provide legitimacy and reduce risks                                                                                                                             | Institutions supporting sustainability-oriented enterprise     | S-macro            | Explicit          |
|     |                                                              |      |                                                                                                                                     |                         | Environmental norms provide normative legitimacy                                                                                                                                                   | Markets supporting sustainability-oriented enterprise          | S-meso             | Explicit          |
|     |                                                              |      |                                                                                                                                     |                         | Supportive social environment is an important organizational culture factor                                                                                                                        | Cultivating sustainability-oriented venture.                   | AF-micro           | Implicit          |



| No. | Author                                       | Year | Title                                                                                                                                      | Entrepreneurship Stream | Articulated Mechanisms (first-order codes)                                                                                                                                                                                                                                                                                                                                                                                                                                | Condensed Mechanisms (second-order themes)                                                                                                                                                                                                                                 | Mechanism Category                                  | Implicit/Explicit                                            |
|-----|----------------------------------------------|------|--------------------------------------------------------------------------------------------------------------------------------------------|-------------------------|---------------------------------------------------------------------------------------------------------------------------------------------------------------------------------------------------------------------------------------------------------------------------------------------------------------------------------------------------------------------------------------------------------------------------------------------------------------------------|----------------------------------------------------------------------------------------------------------------------------------------------------------------------------------------------------------------------------------------------------------------------------|-----------------------------------------------------|--------------------------------------------------------------|
| 60  | Meyskens, M.; Carsrud, A. L.; Cardozo, R. N. | 2010 | The symbiosis of entities in the social engagement network: The role of social ventures                                                    | Social                  | The opportunities social ventures discover are unmet social needs<br><br>Innovative solutions to society's most pressing social problems                                                                                                                                                                                                                                                                                                                                  | Discovering sustainability-oriented opportunities<br><br>Creating local value                                                                                                                                                                                              | AF-micro<br><br>T-meso                              | Explicit<br><br>Implicit                                     |
| 61  | Pacheco, D. F.; Dean, T. J.; Payne, D. S.    | 2010 | Escaping the green prison: Entrepreneurship and the creation of opportunities for sustainable development                                  | Sustainable             | Limitation of market incentives<br><br>Sustainable entrepreneurs transform institutions by altering and/ or creating norms<br>Sustainable entrepreneurs motivate the development of property rights<br><br>Created partnerships and lobbied for state and federal policy<br>Sustainable entrepreneurs encourage cooperative institutions through mandatory rules.                                                                                                         | Markets resisting sustainability-oriented enterprise<br><br>Transforming markets towards sustainable development<br>Transforming markets towards sustainable development<br><br>Creating sustainability-oriented networks<br>Creating sustainability-oriented institutions | S-meso<br><br>T-meso<br>T-meso<br>T-meso<br>T-macro | Implicit<br><br>Explicit<br>Implicit<br>Implicit<br>Implicit |
| 62  | Parrish, B. D.                               | 2010 | Sustainability-driven entrepreneurship: Principles of organization design                                                                  | Sustainable             | Remaining true to sustainability-driven values and purpose                                                                                                                                                                                                                                                                                                                                                                                                                | Developing venture with sustainability values at the core                                                                                                                                                                                                                  | AF-micro                                            | Explicit                                                     |
| 63  | Perrini, F.; Vurro, C.; Costanzo, L. A.      | 2010 | A process-based view of social entrepreneurship: From opportunity identification to scaling-up social change in the case of San Patrignano | Social                  | Opportunity development blends with individual recognition of these opportunities<br><br>Social opportunity formalization articulates the innovativeness of the offering, its expected social impact and the bases for its sustainability                                                                                                                                                                                                                                 | Discovering sustainability-oriented opportunities<br><br>Presenting sustainability-oriented market innovations                                                                                                                                                             | AF-micro<br><br>T-meso                              | Explicit<br><br>Implicit                                     |
| 64  | Rodgers, C.                                  | 2010 | Sustainable entrepreneurship in SMEs: A case study analysis                                                                                | Sustainable             | Ethical drivers determine success of business<br>Green self-education leading to opportunity discovery<br>Hands-on mentality and pragmatic approach of entrepreneurs<br>Market education as goal of eco-enterprises                                                                                                                                                                                                                                                       | Developing venture with sustainability values at the core<br>Discovering sustainability-oriented opportunities<br>Discovering sustainability-oriented opportunities<br>Transforming markets towards sustainable development                                                | AF-micro<br>AF-micro<br>AF-micro<br>T-meso          | Implicit<br>Implicit<br>Implicit<br>Implicit                 |
| 65  | Trivedi, C.                                  | 2010 | Towards a social ecological framework for social entrepreneurship                                                                          | Social                  | Social entrepreneurs possess ethical fibre and social focus                                                                                                                                                                                                                                                                                                                                                                                                               | Developing venture with sustainability values at the core                                                                                                                                                                                                                  | AF-micro                                            | Implicit                                                     |
| 66  | Woolthuis, R. J. K.                          | 2010 | Sustainable entrepreneurship in the Dutch construction industry                                                                            | Sustainable             | System dynamics on institutional level act as constraints                                                                                                                                                                                                                                                                                                                                                                                                                 | Institutions constraining sustainability-oriented enterprise                                                                                                                                                                                                               | S-macro                                             | Implicit                                                     |
| 67  | York, J. G.; Venkataraman, S.                | 2010 | The entrepreneur-environment nexus: Uncertainty, innovation, and allocation                                                                | Environmental           | Existing production/consumption patterns degrading natural environment<br>Reform or revolutionize unsustainable pattern of production<br>Improve ecological resource allocation<br><br>A vast network of new firms has sprung up, offering an array of (sustainability-oriented) services                                                                                                                                                                                 | Institutions degrading the natural environment<br>Transforming markets towards sustainable development<br>Mobilizing resources<br><br>Creating sustainability-oriented networks                                                                                            | S-macro<br>T-meso<br>AF-micro<br>T-meso             | Implicit<br>Implicit<br>Explicit<br>Implicit                 |
| 68  | Yunus, M.; Moingeon, B.; Lehmann-Ortega, L.  | 2010 | Building Social Business Models: Lessons from the Grameen Experience                                                                       | Social                  | Internal paradigm shifts leading to sustainability-oriented discovery<br>Defining clear objectives and goals based on social mission<br>Leveraging expertise and resources by setting up strategic partnerships<br>Launching a series of small experiments to refine business                                                                                                                                                                                             | Discovering sustainability-oriented opportunities<br>Developing venture with sustainability values at the core<br>Partnering with stakeholders<br>Cultivating sustainability-oriented venture                                                                              | AF-micro<br>AF-micro<br>AF-micro<br>AF-micro        | Implicit<br>Implicit<br>Implicit<br>Implicit                 |
| 69  | Bacq, S.; Janssen, F.                        | 2011 | The multiple faces of social entrepreneurship: Social A review of definitional issues based on geographical and thematic criteria          |                         | Ability to detect social opportunities<br><br>Moving resources towards places which offer superior return for Society                                                                                                                                                                                                                                                                                                                                                     | Discovering sustainability-oriented opportunities<br><br>Creating local value                                                                                                                                                                                              | AF-micro<br><br>T-meso                              | Implicit<br><br>Implicit                                     |
| 70  | Holt, D.                                     | 2011 | Where are they now? tracking the longitudinal evolution of environmental businesses from the 1990s                                         | Environmental           | Environmental entrepreneurs creating new products, services or organizations to meet environmental market opportunities                                                                                                                                                                                                                                                                                                                                                   | Presenting sustainability-oriented market innovations                                                                                                                                                                                                                      | T-meso                                              | Implicit                                                     |
| 71  | Jiao, Hiao                                   | 2011 | A conceptual model for social entrepreneurship directed toward social impact on society                                                    | Social                  | Recognize opportunities especially those for transformative social change<br><br>Create solutions for community in an innovative manner                                                                                                                                                                                                                                                                                                                                   | Discovering sustainability-oriented opportunities<br><br>Creating local value                                                                                                                                                                                              | AF-micro<br><br>T-meso                              | Implicit<br><br>Implicit                                     |
| 72  | Khanapuri, V. B.; Khandelwal, M. R.          | 2011 | Scope for fair trade and social entrepreneurship in India                                                                                  | Social                  | Social innovation on a local level                                                                                                                                                                                                                                                                                                                                                                                                                                        | Creating local value                                                                                                                                                                                                                                                       | T-meso                                              | Implicit                                                     |
| 73  | Korsgaard, S.                                | 2011 | Opportunity formation in social entrepreneurship                                                                                           | Social                  | Social entrepreneur discovers, evaluates, exploits and actively mobilizes<br>Collaboration, mobilizing actors to be a part of the venture<br>Skills and mindset that aim at sustainable development                                                                                                                                                                                                                                                                       | Discovering sustainability-oriented opportunities<br>Partnering with stakeholders<br>Discovering sustainability-oriented opportunities                                                                                                                                     | AF-micro<br>AF-meso<br>AF-micro                     | Explicit<br>Implicit<br>Implicit                             |
| 74  | Lautermann, C.                               | 2011 | The ambiguities of (social) value creation: towards an extended understanding of entrepreneurial value creation for society                | Social                  | An approach generates various forms of value for individuals and society                                                                                                                                                                                                                                                                                                                                                                                                  | Creating local value                                                                                                                                                                                                                                                       | T-meso                                              | Implicit                                                     |
| 75  | Ormiston, J.; Seymour, R.                    | 2011 | Understanding Value Creation in Social Entrepreneurship: The Importance of Aligning Mission, Strategy and Impact Measurement               | Social                  | Social Value creation through social innovation                                                                                                                                                                                                                                                                                                                                                                                                                           | Creating local value                                                                                                                                                                                                                                                       | T-meso                                              | Explicit                                                     |
| 76  | Patzelt, H.; Shepherd, D.A.                  | 2011 | Recognizing Opportunities for Sustainable Development                                                                                      | Sustainable             | The more entrepreneurs perceive that their natural/communal environment is threatened, the more likely they will recognize an opportunity for sustainable development.<br>The greater entrepreneurs' knowledge of the natural/communal environment, the more likely they will recognize an opportunity for sustainable development;<br>The greater entrepreneurs' altruism toward others, the more likely they will recognize an opportunity for sustainable development. | Institutions degrading the natural environment<br>Discovering sustainability-oriented opportunities<br>Developing venture with sustainability values at the core                                                                                                           | S-macro<br>AF-micro<br>AF-micro                     | Implicit<br>Implicit<br>Implicit                             |
| 77  | Schaltegger, S.; Wagner, M.                  | 2011 | Sustainable entrepreneurship and sustainability innovation: Categories and interactions                                                    | Sustainable             | Sustainability-oriented creative destruction                                                                                                                                                                                                                                                                                                                                                                                                                              | Presenting sustainability-oriented market innovations                                                                                                                                                                                                                      | T-meso                                              | Implicit                                                     |

| No. | Author                                                                                                                                          | Year | Title                                                                                                                                           | Entrepreneurship Stream | Articulated Mechanisms (first-order codes)                                                                                                       | Condensed Mechanisms (second-order themes)                  | Mechanism Category | Implicit/Explicit |
|-----|-------------------------------------------------------------------------------------------------------------------------------------------------|------|-------------------------------------------------------------------------------------------------------------------------------------------------|-------------------------|--------------------------------------------------------------------------------------------------------------------------------------------------|-------------------------------------------------------------|--------------------|-------------------|
| 78  | Shepherd, D. A.; Patzelt, H.                                                                                                                    | 2011 | The New Field of Sustainable Entrepreneurship: Studying Entrepreneurial Action Linking "What Is to Be Sustained" With "What Is to Be Developed" | Sustainable             | Discover and define new ventures in an innovative manner                                                                                         | Discovering sustainability-oriented opportunities           | AF-micro           | Explicit          |
|     |                                                                                                                                                 |      |                                                                                                                                                 |                         | Eliminate market failures                                                                                                                        | Presenting sustainability-oriented market innovations       | T-meso             | Implicit          |
|     |                                                                                                                                                 |      |                                                                                                                                                 |                         | Markets failing to produce optimum outputs and preserve nature                                                                                   | Market failure causing environmental and social impairment  | S-meso             | Explicit          |
| 79  | Spence, M.; Gherib, J.B.B.; Biwolé, V. O.                                                                                                       | 2011 | Sustainable Entrepreneurship: Is Entrepreneurial will Enough? A North-South Comparison                                                          | Sustainable             | Entrepreneurial values towards sustainability make a difference in venture development                                                           | Developing venture with sustainability values at the core   | AF-micro           | Implicit          |
| 80  | Swanson, L. A.; Zhang, D. D.                                                                                                                    | 2011 | Complexity theory and the social entrepreneurship zone                                                                                          | Social                  | Economic and social value created                                                                                                                | Creating local value                                        | T-meso             | Implicit          |
| 81  | Witkamp, M. J.; Royakkers, L. M. M.; Raven, R. P. J. M.                                                                                         | 2011 | From Cowboys to Diplomats: Challenges for Social Entrepreneurship in The Netherlands                                                            | Social                  | Recognition of new opportunities to serve the social mission                                                                                     | Discovering sustainability-oriented opportunities           | AF-micro           | Implicit          |
|     |                                                                                                                                                 |      |                                                                                                                                                 |                         | Creating shared value between entrepreneurs and society                                                                                          | Creating local value                                        | T-meso             | Implicit          |
| 82  | Chen, S.                                                                                                                                        | 2012 | Creating sustainable international social ventures                                                                                              | Social                  | Add value by satisfying a social need; Creating social value                                                                                     | Creating local value                                        | T-meso             | Implicit          |
| 83  | Clark, C.; Brennan, L.                                                                                                                          | 2012 | Entrepreneurship with social value: A conceptual model for performance measurement                                                              | Social                  | Social output (externalities resulting from businesses)                                                                                          | Creating large-scale value                                  | T-macro            | Implicit          |
|     |                                                                                                                                                 |      |                                                                                                                                                 |                         | Social impact (desired result, long-term changes)                                                                                                | Creating local value                                        | T-meso             | Implicit          |
| 84  | Desa, G.                                                                                                                                        | 2012 | Resource Mobilization in International Social Entrepreneurship: Bricolage as a Mechanism of Institutional Transformation                        | Social                  | <i>Two meanings of bricolage in this paper (both explicit):</i>                                                                                  |                                                             |                    |                   |
|     |                                                                                                                                                 |      |                                                                                                                                                 |                         | Bricolage as way entrepreneurs mobilize resources                                                                                                | Mobilizing resources                                        | AF-micro           | Explicit          |
|     |                                                                                                                                                 |      |                                                                                                                                                 |                         | Bricolage as way to recombine symbolic principles, resources, and practices to bring about institutional change                                  | Transforming institutions towards sustainable development   | T-macro            | Explicit          |
|     |                                                                                                                                                 |      |                                                                                                                                                 |                         | The absence of supportive institutions is often indicative of alternative, more_restrictive institutional arrangements                           | Institutions constrainingsustainability-oriented enterprise | S-macro            | Explicit          |
|     |                                                                                                                                                 |      |                                                                                                                                                 |                         |                                                                                                                                                  |                                                             |                    |                   |
| 85  | Hall, J; Matos, S.; Sheehan, L. & Silvestre, B.                                                                                                 | 2012 | Entrepreneurship and Innovation at the Base of the Pyramid: A Recipe for Inclusive Growth or Social Exclusion?                                  | Social                  | Entrepreneurs recognize unnoticed opportunities at the base of the pyramid.                                                                      | Discovering sustainability-oriented opportunities           | AF-micro           | Implicit          |
| 86  | Kearins, K.; Collins, E.                                                                                                                        | 2012 | Making Sense of Ecopreneurs' Decisions to Sell Up                                                                                               | Environmental           | Identify opportunities in line with their values - environmentally responsible business                                                          | Discovering sustainability-oriented opportunities           | AF-micro           | Implicit          |
|     |                                                                                                                                                 |      |                                                                                                                                                 |                         | Values-based firms selling to mainstream firms                                                                                                   | Co-evolving between market actors                           | AF-meso            | Implicit          |
|     |                                                                                                                                                 |      |                                                                                                                                                 |                         | Bring new products, technologies and services to market                                                                                          | Presenting sustainability-oriented market innovations       | T-meso             | Implicit          |
| 87  | Kury, Kenneth Wm.                                                                                                                               | 2012 | Sustainability Meets Social Entrepreneurship: A Path to Social Change through Institutional Entrepreneurship                                    | Sustainable             | Market failures creating opportunities for entrepreneurs                                                                                         | Market failure causing environmental and social impairment  | S-meso             | Implicit          |
|     |                                                                                                                                                 |      |                                                                                                                                                 |                         | Social engineer creates new systems to replace the old                                                                                           | Transforming markets towards sustainable development        | T-meso             | Implicit          |
| 88  | Lehner, O. M.; Kaniskas, J.                                                                                                                     | 2012 | Opportunity recognition in social entrepreneurship: A thematic meta analysis                                                                    | Social                  | Bringing about systematic change; social/public service innovation                                                                               | Creating local value                                        | T-meso             | Implicit          |
| 89  | Pirson, Michael                                                                                                                                 | 2012 | Social entrepreneurs as the paragons of shared value creation? A critical perspective                                                           | Social                  | Social value creation                                                                                                                            | Creating local value                                        | T-meso             | Implicit          |
| 90  | Santos, F. M.                                                                                                                                   | 2012 | A Positive Theory of Social Entrepreneurship                                                                                                    | Social                  | Neglected problems in society                                                                                                                    | Institutions prompting unmet social needs                   | S-macro            | Implicit          |
|     |                                                                                                                                                 |      |                                                                                                                                                 |                         | Addressing social needs that other neglect                                                                                                       | Discovering sustainability-oriented opportunities           | AF-micro           | Implicit          |
| 91  | Thompson, J. L.                                                                                                                                 | 2012 | Incredible Edible - social and environmental entrepreneurship in the era of the "Big Society"                                                   | Environmental           | Volunteers planted and grew fruits and vegetables in unused spaces in the community, turning eyesore and liability into an asset and opportunity | Collective actions leading to transitions                   | AF-meso            | Implicit          |
|     |                                                                                                                                                 |      |                                                                                                                                                 |                         | transformation of public and green space into small herb gardens and vegetable patches that the public can benefit from                          | Creating local value                                        | T-meso             | Implicit          |
| 92  | Weerawardena, J.; Mort, G. S.                                                                                                                   | 2012 | Competitive strategy in socially entrepreneurial nonprofit organizations: Innovation and differentiation                                        | Social                  | Market failure connected with environmental and social issues                                                                                    | Market failure causing environmental and social impairment  | S-meso             | Explicit          |
|     |                                                                                                                                                 |      |                                                                                                                                                 |                         | Culture building within the venture                                                                                                              | Cultivating sustainability-oriented venture                 | AF-micro           | Implicit          |
|     |                                                                                                                                                 |      |                                                                                                                                                 |                         | Team-based reward systems                                                                                                                        | Cultivating sustainability-oriented venture                 | AF-micro           | Implicit          |
|     |                                                                                                                                                 |      |                                                                                                                                                 |                         | Social value creation                                                                                                                            | Creating local value                                        | T-meso             | Explicit          |
| 93  | Zeyen, A.; Beckmann, M.; Mueller, S.; Dees, J. G.; Khanin, D.; Krueger, N.; Murphy, P. J.; Santos, F.; Scarlata, M.; Walske, J.; Zacharakis, A. | 2012 | Social Entrepreneurship and Broader Theories: Shedding New Light on the 'Bigger Picture'                                                        | Social                  | Awareness of social problems a source of opportunities                                                                                           | Discovering sustainability-oriented opportunities           | AF-micro           | Implicit          |
|     |                                                                                                                                                 |      |                                                                                                                                                 |                         | Boundary spanning and overarching business model architecture                                                                                    | Cultivating sustainability-oriented venture                 | AF-micro           | Implicit          |
| 94  | Ebrashi, R. E.                                                                                                                                  | 2013 | Social entrepreneurship theory and sustainable social impact                                                                                    | Social                  | Non-exclusive social value creation                                                                                                              | Creating local value                                        | T-meso             | Implicit          |
|     |                                                                                                                                                 |      |                                                                                                                                                 |                         | Discovering opportunities to eliminate social and institutional barriers                                                                         | Discovering sustainability-oriented opportunities           | AF-micro           | Implicit          |
|     |                                                                                                                                                 |      |                                                                                                                                                 |                         | Mobilize resources (human and financial resources) as inputs                                                                                     | Mobilizing resources                                        | AF-micro           | Implicit          |
|     |                                                                                                                                                 |      |                                                                                                                                                 |                         |                                                                                                                                                  |                                                             |                    |                   |
| 95  | Gawell, M.                                                                                                                                      | 2013 | Social entrepreneurship – innovative challengers or adjustable followers?                                                                       | Social                  | Entrepreneurs pushing forward or following others                                                                                                | Co-evolving between market actors                           | AF-meso            | Implicit          |

| No. | Author                                              | Year | Title                                                                                                                                        | Entrepreneurship Stream | Articulated Mechanisms (first-order codes)                                                                                                             | Condensed Mechanisms (second-order themes)                                                                     | Mechanism Category   | Implicit/Explicit    |
|-----|-----------------------------------------------------|------|----------------------------------------------------------------------------------------------------------------------------------------------|-------------------------|--------------------------------------------------------------------------------------------------------------------------------------------------------|----------------------------------------------------------------------------------------------------------------|----------------------|----------------------|
| 96  | Gawell, M.                                          | 2013 | Social Entrepreneurship: Action Grounded in Needs, Opportunities and/or Perceived Necessities?                                               | Social                  | Supportive business context                                                                                                                            | Markets supporting sustainability-oriented enterprise                                                          | S-meso               |                      |
| 97  | Hansen, E. G.; Schaltegger, S.                      | 2013 | 100 per cent organic? A sustainable entrepreneurship perspective on the diffusion of organic clothing                                        | Sustainable             | Sustainability-oriented creative destruction                                                                                                           | Presenting sustainability-oriented market innovations                                                          | T-meso               | Implicit             |
| 98  | Levinsohn, D.                                       | 2013 | Disembedded and beheaded? - A critical review of the emerging field of sustainability entrepreneurship                                       | Sustainable             | Various types of opportunity recognition in sustainability-oriented enterprises                                                                        | Discovering sustainability-oriented opportunities                                                              | AF-micro             | Implicit             |
| 99  | Luke, B.; Chu, V.                                   | 2013 | Social enterprise versus social entrepreneurship: An examination of the 'why' and 'how' in pursuing social change                            | Social                  | New innovative ways to address poverty alleviation                                                                                                     | Creating local value                                                                                           | T-meso               | Explicit             |
| 100 | Renko, M.                                           | 2013 | Early challenges of nascent social entrepreneurs                                                                                             | Social                  | Underlying motivation is to create social value                                                                                                        | Developing venture with sustainability values at the core                                                      | AF-micro             | Implicit             |
|     |                                                     |      |                                                                                                                                              |                         | Solutions by social entrepreneurs often have to be improvised and invented on the spot, requiring creativity and novel approaches.                     | Discovering sustainability-oriented opportunities                                                              | AF-micro             | Implicit             |
|     |                                                     |      |                                                                                                                                              |                         | Radicalness of pro-social innovation                                                                                                                   | Creating local value                                                                                           | T-meso               | Implicit             |
| 101 | Ruebottom, T.                                       | 2013 | The microstructures of rhetorical strategy in social entrepreneurship: Building legitimacy through heroes and villains                       | Social                  | Social enterprise with change agenda can bring institutional change/ transformation                                                                    | Transforming institutions towards sustainable development                                                      | T-macro              | Implicit             |
| 102 | Schaltegger, S.; Hansen, E.G.                       | 2013 | Industry Transformation through sustainable entrepreneurship. Examples in the Apparel and Energy Industries                                  | Sustainable             | Sustainability-oriented creative destruction                                                                                                           | Presenting sustainability-oriented market innovations                                                          | T-meso               | Implicit             |
| 103 | Spitzeck, H.; Boechat, C.; Leão, S. F.              | 2013 | Sustainability as a driver for innovation-towards a model of corporate social entrepreneurship at Odebrecht in Brazil                        | Social                  | Supportive business context                                                                                                                            | Markets supporting sustainability-oriented enterprise                                                          | S-meso               | Implicit             |
|     |                                                     |      |                                                                                                                                              |                         | Characteristics of entrepreneurs, including sustainability values<br>Sustainability vision                                                             | Developing venture with sustainability values at the core<br>Discovering sustainability-oriented opportunities | AF-micro<br>AF-micro | Explicit<br>Implicit |
|     |                                                     |      |                                                                                                                                              |                         | Collaboration with stakeholders<br>Social impact and value creation on market/local level                                                              | Partnering with stakeholders<br>Creating local value                                                           | AF-micro<br>T-meso   | Explicit<br>Implicit |
| 104 | Tobias, J.M.; Mair, J.; Barbosa-Leiker, C.          | 2013 | Toward a theory of transformative entrepreneurship: Poverty reduction and conflict resolution in Rwanda's entrepreneurial coffee sector      | Social                  | Social value creation through transformative entrepreneurship                                                                                          | Creating large-scale value                                                                                     | T-macro              | Implicit             |
|     |                                                     |      |                                                                                                                                              |                         | Discovery and generation of change processes to remove economic and social constraints                                                                 | Discovering sustainability-oriented opportunities                                                              | AF-micro             | Explicit             |
| 105 | Wilson, F.; Post, J. E.                             | 2013 | Business models for people, planet (& profits): Exploring the phenomena of social business, a market-based approach to social value creation | Social                  | Clear intentionality around social purpose                                                                                                             | Developing venture with sustainability values at the core                                                      | AF-micro             | Explicit             |
|     |                                                     |      |                                                                                                                                              |                         | Venture-level hybridization; Economically self-sustaining rather than donation-model                                                                   | Managing tensions in hybrid firms                                                                              | AF-micro             | Implicit             |
|     |                                                     |      |                                                                                                                                              |                         | Careful and intentional consideration and inclusion of multiple stakeholders                                                                           | Partnering with stakeholders                                                                                   | AF-micro             | Implicit             |
| 106 | Baierl, R.; Grichnik, D.; Spörrle, M.; Welpe, I. M. | 2014 | Antecedents of Social Entrepreneurial Intentions: The Role of an Individual's General Social Appraisal                                       | Social                  | The entrepreneurs' general appraisal of (social) opportunities                                                                                         | Discovering sustainability-oriented opportunities                                                              | AF-micro             | Implicit             |
| 107 | Choi, N.; Majumdar, S.                              | 2014 | Social entrepreneurship as an essentially contested concept: Opening a new avenue for systematic future research                             | Social                  | Creating social wealth, addressing social issues and problems                                                                                          | Creating local value                                                                                           | T-meso               | Implicit             |
|     |                                                     |      |                                                                                                                                              |                         | Social innovation is connected to social change, business model innovation, process innovation                                                         | Presenting sustainability-oriented market innovations                                                          | T-meso               | Implicit             |
| 108 | Dufays, F.; Huybrechts, B.                          | 2014 | Connecting the Dots for Social Value: A Review on Social Networks and Social Entrepreneurship                                                | Social                  | Coalition of actors brought together by social needs may trigger social entrepreneurship                                                               | Collective actions leading to transitions                                                                      | AF-meso              | Implicit             |
| 109 | Fellnhöfer, K.; Bouncken, R. B.; Kraus, S.R.        | 2014 | The Current state of research on sustainable entrepreneurship                                                                                | Sustainable             | Product or process with a social purpose                                                                                                               | Presenting sustainability-oriented market innovations                                                          | T-meso               | Implicit             |
| 110 | Gibbs, D.; O'Neill, K.                              | 2014 | Rethinking sociotechnical transitions and green entrepreneurship: the potential for transformative change in the green building sector       | Environmental           | Innovative technological niches in effecting transitions                                                                                               | Presenting sustainability-oriented market innovations                                                          | T-meso               | Implicit             |
| 111 | Gras, D.; Mendoza-Abarca, K. I.                     | 2014 | Risky business? The survival implications of exploiting commercial opportunities by nonprofits                                               | Social                  | Inclusion of market-based stakeholders                                                                                                                 | Partnering with stakeholders                                                                                   | AF-micro             | Implicit             |
| 112 | Gray, B. J.; Duncan, S.; Kirkwood, J.; Walton, S.   | 2014 | Encouraging sustainable entrepreneurship in climate-threatened communities: a Samoan case study                                              | Sustainable             | Institutional and social contexts provide individuals with opportunities                                                                               | Institutions supporting sustainability-oriented enterprise                                                     | S-meso               | Implicit             |
|     |                                                     |      |                                                                                                                                              |                         | Identifying and exploiting social opportunities                                                                                                        | Discovering sustainability-oriented opportunities                                                              | AF-micro             | Implicit             |
| 113 | Jackson, W. T.; Jackson, M. J.                      | 2014 | Social enterprises and social entrepreneurs: One size does not fit all                                                                       | Social                  | Profitability (Mixed Entrepreneurial Focus)                                                                                                            | Cultivating sustainability-oriented venture                                                                    | AF-micro             | Implicit             |
| 114 | Kirkwood, J.; Walton, S.                            | 2014 | How green is green? Ecopreneurs balancing environmental concerns and business goals                                                          | Environmental           | Differentiated Entrepreneurial Focus                                                                                                                   | Successive balancing                                                                                           | AF-micro             | Implicit             |
|     |                                                     |      |                                                                                                                                              |                         | Balance opposing forces of environment and economy<br>Introducing new sustainability innovations (products and processes), but also the venture itself | Managing tensions in hybrid firms<br>Presenting sustainability-oriented market innovations                     | AF-micro<br>S-meso   | Implicit             |
| 115 | Klewitz, J.; Hansen, E. G.                          | 2014 | Sustainability-oriented innovation of SMEs:A systematic review                                                                               | Environmental           | External stimuli (customer demands, government regulations)                                                                                            | Institutions supporting sustainability-oriented enterprise                                                     | S-macro-meso         | Implicit             |
|     |                                                     |      |                                                                                                                                              |                         | Internal stimuli, recognition of ecologically-oriented opportunities                                                                                   | Discovering sustainability-oriented opportunities                                                              | AF-micro             | Implicit             |
|     |                                                     |      |                                                                                                                                              |                         | Eco-innovations (both product - eco-design, and process - cleaner production)                                                                          | Presenting sustainability-oriented marketinnovations                                                           | S-meso               | Implicit             |
| 116 | Kroeger, A.; Weber, C. (reference paper)            | 2014 | Developing a conceptual framework for comparing social value creation                                                                        | Social                  | Social value creation                                                                                                                                  | Creating local value                                                                                           | T-meso               | Implicit             |
| 117 | Newth, J.; Woods, C.                                | 2014 | Resistance to Social Entrepreneurship: How Context Shapes Innovation                                                                         | Social                  | Institutional forces resisting entrepreneurial activity                                                                                                | Institutions constraining sustainability-oriented enterprise                                                   | S-macro              | Explicit             |
|     |                                                     |      |                                                                                                                                              |                         | Market forces constraining entrepreneurial activity                                                                                                    | Markets resisting sustainability-oriented enterprise                                                           | S-meso               | Explicit             |



| No. | Author                                                         | Year | Title                                                                                                                                                   | Entrepreneurship Focus | Articulated Mechanisms (first-order codes)                                                                                                                                              | Condensed Mechanisms (second-order themes)                     | Mechanism Category | Implicit/Explicit |
|-----|----------------------------------------------------------------|------|---------------------------------------------------------------------------------------------------------------------------------------------------------|------------------------|-----------------------------------------------------------------------------------------------------------------------------------------------------------------------------------------|----------------------------------------------------------------|--------------------|-------------------|
| 118 | Ney, S.; Beckmann, M.; Graebnitz, D.; Mirkovic, R.             | 2014 | Social entrepreneurs and social change: Tracing impacts of social entrepreneurship through ideas, structures and practices                              | Social                 | Opportunities emerge from social contexts                                                                                                                                               | Institutions prompting unmet social needs                      | S-macro            | Implicit          |
|     |                                                                |      |                                                                                                                                                         |                        | Entrepreneurs recognize opportunities and design innovations that exploit the potential for social change                                                                               | Discovering sustainability-oriented opportunities              | AF-micro           | Implicit          |
|     |                                                                |      |                                                                                                                                                         |                        | Turn an industry or sector on its head for the greater good                                                                                                                             | Transforming markets towards sustainable development           | S-meso             | Implicit          |
| 119 | Nicolopoulou, K.                                               | 2014 | Social entrepreneurship between cross-currents: Toward a framework for theoretical restructuring of the field                                           | Social                 | Explicating social and environmental opportunities based on cultural sustainability needs                                                                                               | Discovering sustainability-oriented opportunities              | AF-micro           | Implicit          |
|     |                                                                |      |                                                                                                                                                         |                        | Ability to establish business with confined resources                                                                                                                                   | Cultivating sustainability-oriented venture                    | AF-micro           | Implicit          |
| 120 | Patra, S.K.; Nath, S.C.                                        | 2014 | Social Transformation Through Social Entrepreneurship: An Exploratory Study                                                                             | Social                 | create innovative initiatives, build new social arrangements,                                                                                                                           | Creating local value                                           | T-meso             | Implicit          |
|     |                                                                |      |                                                                                                                                                         |                        | Scaling social impact on global level                                                                                                                                                   | Creating large-scale value                                     | T-macro            | Implicit          |
| 121 | Phillips, W.; Lee, H.; Ghobadian, A.; O'Regan, N.; James, P.   | 2014 | Social Innovation and Social Entrepreneurship: A Systematic Review                                                                                      | Social                 | Entrepreneurs are reliant on institutional support to help them address social needs                                                                                                    | Institutions supporting sustainability-oriented enterprise     | S-macro            | Implicit          |
|     |                                                                |      |                                                                                                                                                         |                        | Take advantage of an opportunity for action in order to modify social relations                                                                                                         | Discovering sustainability-oriented opportunities              | AF-micro           | Explicit          |
|     |                                                                |      |                                                                                                                                                         |                        | Offer social innovation in local context                                                                                                                                                | Creating local value                                           | T-meso             | Implicit          |
| 122 | Rahman, S.A.; Amran, A.; Ahmad, N.H.; Taghizadeh, S.K.         | 2014 | GrameenPhone: Creating a Win-Win at the Base of the Pyramid in Bangladesh                                                                               | Social                 | Recognizing business opportunities for individuals at base of the pyramid: Grameen Phone as an example.                                                                                 | Discovering sustainability-oriented opportunities              | AF-micro           | Explicit          |
| 123 | Raudeliuniene, J.; Tvaronavičiene, M.; Dzemyda, I.             | 2014 | Towards economic security and sustainability: Key success factors Of sustainable entrepreneurship in conditions of global economy                       | Sustainable            | Market failures which detract from sustainability                                                                                                                                       | Market failure causing environmental and social impairment     | S-meso             | Implicit          |
|     |                                                                |      |                                                                                                                                                         |                        | Entrepreneurs' ability to recognize emerging opportunities and conditions in                                                                                                            | Discovering sustainability-oriented opportunities              | AF-micro           | Implicit          |
|     |                                                                |      |                                                                                                                                                         |                        | the external environment                                                                                                                                                                |                                                                |                    |                   |
| 124 | York, J.; Lenox, M. J.                                         | 2014 | Socio-Cultural Determinants of De Novo Versus De Alio Entry in Emerging Industries                                                                      | Environmental          | Sociocultural factors can promote both normative (values and expectations) and cultural-cognitive (schema and awareness) legitimacy for an emergent industry.                           | Institutions supporting sustainability-oriented enterprise     | S-macro            | Implicit          |
|     |                                                                |      |                                                                                                                                                         |                        | Social movements on wider social scale                                                                                                                                                  | Social movements empowering sustainability-oriented enterprise | S-meso             | Implicit          |
|     |                                                                |      |                                                                                                                                                         |                        | Social norms may influence entrepreneurial entry through perceiving entrepreneurship as socially desirable and perceiving specific entrepreneurial opportunities as socially desirable. | Social networks encouraging sustainability-oriented enterprise | S-meso             | explicit          |
| 125 | Zahra, S. A.; Newey, L. R.; Li, Y.                             | 2014 | On the Frontiers: The Implications of Social Entrepreneurship for International Entrepreneurship                                                        | Social                 | Opportunities in the sustainability context, turning social issues into profitable opportunities                                                                                        | Discovering sustainability-oriented opportunities              | AF-micro           | Implicit          |
|     |                                                                |      |                                                                                                                                                         |                        | Social innovations create new social relationships or collaborations                                                                                                                    | Creating local value                                           | T-meso             | Implicit          |
|     |                                                                |      |                                                                                                                                                         |                        |                                                                                                                                                                                         |                                                                |                    |                   |
| 126 | Zhang, D. D.; Swanson, L. A.                                   | 2014 | Linking Social Entrepreneurship and Sustainability                                                                                                      | Social                 | Likely to find opportunities in dynamic social environment, poor economic environment.                                                                                                  | Discovering sustainability-oriented opportunities              | AF-micro           | Implicit          |
|     |                                                                |      |                                                                                                                                                         |                        | Bricolage, often experimenting with how resources can be utilized to produce new outcomes                                                                                               | Mobilizing resources                                           | AF-micro           | Explicit          |
|     |                                                                |      |                                                                                                                                                         |                        | Catalyze social change and/or address social needs                                                                                                                                      | Creating local value                                           | T-meso             | Implicit          |
| 127 | Agafonow, A.                                                   | 2015 | Value Creation, Value Capture, and Value Devolution: Where Do Social Enterprises Stand?                                                                 | Social                 | Introducing profitability along with impact investment                                                                                                                                  | Successive balancing                                           | AF-micro           | Implicit          |
|     |                                                                |      |                                                                                                                                                         |                        | Value-driven business venture                                                                                                                                                           | Developing venture with sustainability values at the core      | AF-micro           | Explicit          |
|     |                                                                |      |                                                                                                                                                         |                        | Value creation for a vulnerable clientele at the local level                                                                                                                            | Creating local value                                           | T-macro            | Explicit          |
| 128 | Bocken, N. M. P.                                               | 2015 | Sustainable venture capital – catalyst for sustainable start-up success?                                                                                | Sustainable            | Value-based approach initiate social and environmental change in society                                                                                                                | Developing venture with sustainability values at the core      | AF-micro           | Explicit          |
|     |                                                                |      |                                                                                                                                                         |                        | Sustainable start-ups find opportunities in sustainable business model innovation                                                                                                       | Discovering sustainability-oriented opportunities              | AF-micro           | Implicit          |
| 129 | Hapenciuc, C. V.; Pînzaru, F.; Vătămănescu, E.-M.; Stanciu, P. | 2015 | Converging sustainable entrepreneurship and the contemporary marketing practices. An insight into Romanian start-ups                                    | Sustainable            | Opportunities arise from market failures and disequilibria                                                                                                                              | Market failure causing environmental and social impairment     | S-meso             | Implicit          |
|     |                                                                |      |                                                                                                                                                         |                        | Introduction of innovative sustainable products and services                                                                                                                            | Presenting sustainability-oriented market innovations          | T-meso             | Implicit          |
| 130 | Hörisch, J.                                                    | 2015 | Crowdfunding for environmental ventures: An empirical analysis of the influence of environmental orientation on the success of crowdfunding initiatives | Sustainable            | Opportunities due to market failures linked to environmental problems                                                                                                                   | Market failure causing environmental and social impairment     | S-meso             | Implicit          |
|     |                                                                |      |                                                                                                                                                         |                        | Crowdfunding seen as innovative, new way to obtain necessary capital for new venture creation                                                                                           | Mobilizing resources                                           | AF-micro           | Implicit          |
| 131 | Hörisch, J.                                                    | 2015 | The Role of Sustainable Entrepreneurship in Sustainability Transitions: A Conceptual Synthesis against the Background of the Multi-Level Perspective    | Sustainable            | Sustainability transitions are defined as transitions that lead to more sustainable systems of production and consumption                                                               | Transforming markets towards sustainable development           | T-meso             | Implicit          |

| No. | Author                                                               | Year | Title                                                                                                                                                                 | Entrepreneurship Stream | Articulated Mechanisms (first-order codes)                                                                                                                                                                  | Condensed Mechanisms (second-order themes)                   | Mechanism Category | Implicit/Explicit |
|-----|----------------------------------------------------------------------|------|-----------------------------------------------------------------------------------------------------------------------------------------------------------------------|-------------------------|-------------------------------------------------------------------------------------------------------------------------------------------------------------------------------------------------------------|--------------------------------------------------------------|--------------------|-------------------|
| 132 | Jolink, A.; Niesten, E.                                              | 2015 | Sustainable Development and Business Models of Entrepreneurs in the Organic Food Industry                                                                             | Environmental           | Environmental degradation                                                                                                                                                                                   | Institutions degrading the natural environment               | S-macro            | Explicit          |
|     |                                                                      |      |                                                                                                                                                                       |                         | Value creation addresses what customers value and don't value                                                                                                                                               | Creating local value                                         | T-meso             | Implicit          |
| 133 | Kibler, E.; Fink, M.; Lang, R.; Muñoz, P.                            | 2015 | Place attachment and social legitimacy: Revisiting the sustainable entrepreneurship journey                                                                           | Sustainable             | Local resources more likely to pursue environmental protection and social justice                                                                                                                           | Mobilizing resources                                         | AF-micro           | Implicit          |
| 134 | Mendoza-Abarca, K. I.; Anokhin, S.; Zamudio, C.                      | 2015 | Uncovering the influence of social venture creation on commercial venture creation: A population ecology perspective                                                  | Social                  | Social ventures build around a specific social mission, value creation is a positive externality                                                                                                            | Creating local value                                         | T-meso             | Implicit          |
| 135 | Muñoz, P.; Dimov, D.                                                 | 2015 | The call of the whole in understanding the development of sustainable ventures                                                                                        | Sustainable             | Social context and culture enable an environment for sustainable value creation                                                                                                                             | Institutions supporting sustainability-oriented enterprise   | S-macro            | Explicit          |
|     |                                                                      |      |                                                                                                                                                                       |                         | Embeddedness in enabling business context                                                                                                                                                                   | Markets supporting sustainability-oriented enterprise        | S-meso             | Explicit          |
| 136 | Pinkse, J.; Groot, K.                                                | 2015 | Sustainable entrepreneurship and corporate political activity: Overcoming market barriers in the clean energy sector                                                  | Sustainable             | Inconsistent government policies problem for entrepreneurs                                                                                                                                                  | Institutions constraining sustainability-oriented enterprise | S-macro            | Explicit          |
|     |                                                                      |      |                                                                                                                                                                       |                         | Industry norms determine business opportunities                                                                                                                                                             | Markets supporting sustainability-oriented enterprise        | S-meso             | Implicit          |
|     |                                                                      |      |                                                                                                                                                                       |                         | Sustainable entrepreneurs struggle with market barriers                                                                                                                                                     | Markets resisting sustainability-oriented enterprise         | S-meso             | Implicit          |
|     |                                                                      |      |                                                                                                                                                                       |                         | Development of new products, services, business model                                                                                                                                                       | Presenting sustainability-oriented market innovations        | T-meso             | Implicit          |
|     |                                                                      |      |                                                                                                                                                                       |                         | Change of government policy and industry norms                                                                                                                                                              | Creating sustainability-oriented institutions                | T-macro            | Explicit          |
| 137 | Schaefer, K.; Corner, P.D.; Kearins, K.                              | 2015 | Social, Environmental and Sustainable Entrepreneurship Research: What Is Needed for Sustainability-as-Flourishing?                                                    | Sustainable             | Transformational change towards sustainability-as-flourishing involves fundamental change in society's culture and collective consciousness that enables the creation of new collective beliefs and values. | Transforming institutions towards sustainable development    | T-macro            | Implicit          |
|     |                                                                      |      |                                                                                                                                                                       |                         | Opportunities for the earth to flourish                                                                                                                                                                     | Discovering sustainability-oriented opportunities            | AF-micro           | Implicit          |
| 138 | Silajdzic, I.; Kurtagic, S.; Vucijak, B.                             | 2015 | Green entrepreneurship in transition economies: a case study of Bosnia and Herzegovina                                                                                | Sustainable             | Better cooperation with stakeholder could strengthen market position (e.g. with local governments)                                                                                                          | Partnering with stakeholders                                 | AF-micro           | Implicit          |
| 139 | Stevens, R.; Moray, N.; Bruneel, J.                                  | 2015 | The Social and Economic Mission of Social Enterprises: Dimensions, Measurement, Validation, and Relation                                                              | Social                  | Certain individuals with particular values, capabilities, and skills seem to be attracted to social entrepreneurship                                                                                        | Developing venture with sustainability values at the core    | AF-micro           | Implicit          |
|     |                                                                      |      |                                                                                                                                                                       |                         | Value creation for the public good                                                                                                                                                                          | Creating local value                                         | T-meso             | Implicit          |
| 140 | Thompson, N. A.; Herrmann, A. M.; Hekkert, M. P.                     | 2015 | How sustainable entrepreneurs engage in institutional change: Insights from biomass torrefaction in the Netherlands                                                   | Sustainable             | Sustainable entrepreneurs find bottom-up solutions to transform and redirect the path of socio-economic development towards sustainable development                                                         | Transforming institutions towards sustainable development    | T-macro            | Explicit          |
|     |                                                                      |      |                                                                                                                                                                       |                         | network building or 'running in packs' to develop 'niche' markets                                                                                                                                           | Creating sustainability-oriented networks                    | T-meso             | Implicit          |
| 141 | Doblinger, C.; Dowling, M.; Helm, R.                                 | 2016 | An institutional perspective of publicpolicy and network effects in the renewable energy industry: enablers or disablers of entrepreneurial behaviour and innovation? | Environmental           | Public authorities acknowledging societal problems                                                                                                                                                          | Institutions prompting unmet social needs                    | S-macro            | implicit          |
|     |                                                                      |      |                                                                                                                                                                       |                         | Regulatory uncertainty leading to inaction                                                                                                                                                                  | Institutions constraining sustainability-oriented enterprise | S-macro            | Implicit          |
|     |                                                                      |      |                                                                                                                                                                       |                         | Industry networks promoting sustainability activities                                                                                                                                                       | Markets supporting sustainability-oriented enterprise        | S-meso             | Implicit          |
| 142 | Hahn, R.; Ince, I.                                                   | 2016 | Constituents and Characteristics of Hybrid Businesses: A Qualitative, Empirical Framework                                                                             | Sustainable             | Personal, immaterial motives driving towards sustainability                                                                                                                                                 | Developing venture with sustainability values at the core    | AF-micro           | implicit          |
|     |                                                                      |      |                                                                                                                                                                       |                         | Hybrid entrepreneurs should anticipate potential tensions and act so their financial goals serve their missions (social and ecological value creation)                                                      | Managing tensions in hybrid firms                            | AF-micro           | Explicit          |
|     |                                                                      |      |                                                                                                                                                                       |                         | Participatory, including and empowering stakeholders                                                                                                                                                        | Partnering with stakeholders                                 | AF-micro           | Implicit          |
| 143 | Jolly, S.; Spodniak, P.; Raven, R.P.J.M.                             | 2016 | Institutional entrepreneurship in transforming energy systems towards sustainability: Wind energy in Finland and India                                                | Sustainable             | Governmental involvement and incentives                                                                                                                                                                     | Institutions supporting sustainability-oriented enterprise   | S-macro            | Implicit          |
|     |                                                                      |      |                                                                                                                                                                       |                         | Legal framework impedes the development of sustainable technologies                                                                                                                                         | Institutions constraining sustainability-oriented enterprise | S-macro            | Implicit          |
|     |                                                                      |      |                                                                                                                                                                       |                         | Constraints appear due to institutional voids                                                                                                                                                               | Institutions constraining sustainability-oriented enterprise | S-macro            | Implicit          |
| 144 | Markman, G. D.; Russo, M.; Lumpkin, G. T.; Jennings, P. D.; Mair, J. | 2016 | Entrepreneurship as a Platform for Pursuing Multiple Goals: A Special Issue on Sustainability, Ethics, and Entrepreneurship                                           | Sustainable             | Entrepreneurs motivate other firms to adopt more moral, responsible practices and influence industry to create social value.                                                                                | Presenting sustainability-oriented market innovations        | T-meso             | Implicit          |
| 145 | O'Neil, I.; Ucbasaran, D.                                            | 2016 | Balancing "what matters to me" with "what matters to them": Exploring the legitimization process of environmental entrepreneurs                                       | Environmental           | Entrepreneurs learn skillful legitimization via perspective taking, reflection and reflexivity, involving the role of values and beliefs                                                                    | Developing venture with sustainability values at the core    | AF-micro           | Implicit          |
| 146 | Pathak, S.; Muralidharan, E.                                         | 2016 | Informal Institutions and Their Comparative Influences on Social and Commercial Entrepreneurship: The Role of In-Group Collectivism and Interpersonal Trust           | Social                  | In-group collectivism                                                                                                                                                                                       | Collective actions leading to transitions                    | AF-meso            | Implicit          |
|     |                                                                      |      |                                                                                                                                                                       |                         | Interpersonal trust between multiple actors                                                                                                                                                                 | Co-evolving between market actors                            | AF-meso            | Implicit          |
| 147 | Rahdari, A.; Sepasi, S.; Moradi, M.                                  | 2016 | Achieving sustainability through Schumpeterian social entrepreneurship: The role of social enterprises                                                                | Social                  | Sustainable creative destruction                                                                                                                                                                            | Presenting sustainability-oriented market innovations        | T-meso             | Implicit          |
| 148 | Schaltegger, S.; Lüdeke-Freund, F.; Hansen, E. G.                    | 2016 | Business Models for Sustainability                                                                                                                                    | Sustainable             | Upscaling of the venture via growth                                                                                                                                                                         | Cultivating sustainability-oriented venture                  | AF-micro           | Implicit          |
|     |                                                                      |      |                                                                                                                                                                       |                         | Upgrading of the venture via mergers and acquisitions, replication and mimicry                                                                                                                              | Co-evolving between market actors                            | AF-meso            | Implicit          |
|     |                                                                      |      |                                                                                                                                                                       |                         | Enlarge distributor network while ensuring a high level of sustainability                                                                                                                                   | Creating sustainability-oriented networks                    | T-meso             | Implicit          |
| 149 | Stål, H. I.; Bonnedahl, K.                                           | 2016 | Conceptualizing strong sustainable entrepreneurship                                                                                                                   | Sustainable             | Environmental degradation                                                                                                                                                                                   | Institutions degrading the natural environment               | S-macro            | Explicit          |
|     |                                                                      |      |                                                                                                                                                                       |                         | Cognitive and creative actions in in problem-solving                                                                                                                                                        | Discovering sustainability-oriented opportunities            | AF-micro           | implicit          |



| No. | Author                                            | Year                   | Title                                                                                                                                          | Entrepreneurship Stream | Articulated Mechanisms (first-order codes)                                                                                     | Condensed Mechanisms (second-order themes)                                                            | Mechanism Category             | Implicit/Explicit                |
|-----|---------------------------------------------------|------------------------|------------------------------------------------------------------------------------------------------------------------------------------------|-------------------------|--------------------------------------------------------------------------------------------------------------------------------|-------------------------------------------------------------------------------------------------------|--------------------------------|----------------------------------|
| 150 | York, J.; Hargrave, T.J.; Pacheco, D.F.           | 2016                   | CONVERGING WINDS: LOGIC HYBRIDIZATION IN THE COLORADO WIND ENERGY FIELD                                                                        | Environmental           | Recursive process of field-level hybridization and adaptation                                                                  | Logic hybridization leading to field-level change                                                     | AF-meso                        | Explicit                         |
|     |                                                   |                        |                                                                                                                                                |                         | Finding solutions for tensions within hybrid firms                                                                             | Managing tensions in hybrid firms                                                                     | AF-micro                       | Implicit                         |
| 151 | York, J.G.; O'Neil, I.; Sarasvathy, S. D.         | 2016                   | Exploring Environmental Entrepreneurship: Identity Coupling, Venture Goals, and Stakeholder Incentives                                         | Environmental           | A hybrid identity unlocks the balance of "ecologizing" and "economizing"                                                       | Successive balancing                                                                                  | AF-micro                       | Implicit                         |
|     |                                                   |                        |                                                                                                                                                |                         | Co-creation of venture by involving stakeholders                                                                               | Partnering with stakeholders                                                                          | AF-micro                       | Implicit                         |
|     |                                                   |                        |                                                                                                                                                |                         | Effectuation describes how entrepreneurs utilize their identity, resources, and stakeholder commitments to create new ventures | Cultivating sustainability-oriented venture                                                           | AF-micro                       | Implicit                         |
| 152 | Belz, F.M.; Binder, J.K.                          | 2017                   | Sustainable Entrepreneurship: A Convergent Process Model                                                                                       | Sustainable             | Market imperfections                                                                                                           | Market failure causing environmental and social impairment                                            | S-meso                         | Implicit                         |
|     |                                                   |                        |                                                                                                                                                |                         | Opportunity identification                                                                                                     | Discovering sustainability-oriented opportunities                                                     | AF-micro                       | Implicit                         |
|     |                                                   |                        |                                                                                                                                                |                         | Balancing - double-bottom line solution<br>Balancing - triple-bottom line solution<br>Creating sustainable markets             | Successive balancing<br>Successive balancing<br>Presenting sustainability-oriented market innovations | AF-micro<br>AF-micro<br>T-meso | Explicit<br>Explicit<br>Implicit |
| 153 | de Lange, D. E.                                   | 2017                   | Start-up sustainability: An insurmountable cost or a life-giving investment?                                                                   | Sustainable             | Institutional actors socially construct preferences for sustainability                                                         | Institutions supporting sustainability-oriented enterprise                                            | S-macro                        | Implicit                         |
| 154 | DiVito, L.; Bohnsack, R.                          | 2017                   | Entrepreneurial orientation and its effect on sustainability decision tradeoffs: The case of sustainable fashion firms                         | Sustainable             | entrepreneurial orientation geared on sustainability, e.g. futurity                                                            | Developing venture with sustainability values at the core                                             | AF-micro                       | Explicit                         |
|     |                                                   |                        |                                                                                                                                                |                         | Entrepreneurs take a proactive approach to finding sustainability-oriented solutions                                           | Discovering sustainability-oriented opportunities                                                     | AF-micro                       | Implicit                         |
| 155 | Gasbarro, F.; Annunziata, E.; Rizzi, F.; Frey, M. | 2017                   | The Interplay Between Sustainable Entrepreneurs and Public Authorities: Evidence From Sustainable Energy Transitions                           | Sustainable             | Public authorities acknowledging societal problems                                                                             | Institutions prompting unmet social needs                                                             | S-macro                        | Implicit                         |
|     |                                                   |                        |                                                                                                                                                |                         | Co-evolutionary processes towards sustainable development                                                                      | Co-evolving between market actors                                                                     | AF-meso                        | Implicit                         |
|     |                                                   |                        |                                                                                                                                                |                         | Network of companies/ cooperation                                                                                              | Collective actions leading to transitions                                                             | AF-meso                        | Implicit                         |
|     |                                                   |                        |                                                                                                                                                |                         | leading sustainability change                                                                                                  |                                                                                                       |                                |                                  |
| 156 | Gast, J.; Gundolf, K.; Cesinger, B.               | 2017                   | Doing business in a green way: A systematic review of the ecological sustainability entrepreneurship literature and future research directions | Environmental           | Institutions promoting ecological ventures                                                                                     | Institutions supporting sustainability-oriented enterprise                                            | S-macro                        | Implicit                         |
|     |                                                   |                        |                                                                                                                                                |                         | Values-driven entrepreneurship                                                                                                 | Developing venture with sustainability values at the core                                             | AF-micro                       | Explicit                         |
|     |                                                   |                        |                                                                                                                                                |                         | Networking with external stakeholders                                                                                          | Partnering with stakeholders                                                                          | AF-micro                       | Implicit                         |
|     |                                                   |                        |                                                                                                                                                |                         | Network of companies/ cooperation                                                                                              | Collective actions leading to transitions                                                             | AF-meso                        | Implicit                         |
|     |                                                   |                        |                                                                                                                                                |                         | Sustainable value creation                                                                                                     | Creating large-scale value                                                                            | T-macro                        | Implicit                         |
| 157 | Hockerts, Kai                                     | 2017                   | Determinants of Social Entrepreneurial Intentions                                                                                              | Social                  | Supportive social context                                                                                                      | Social networks encouraging sustainability-oriented enterprise                                        | S-meso                         | Implicit                         |
|     |                                                   |                        |                                                                                                                                                |                         | Empathy based on prior experience and (physical) distance to these problems                                                    | Discovering sustainability-oriented opportunities                                                     | AF-micro                       | Implicit                         |
| 158 | Hörisch, J.; Kollat, J.; Brieger, S.              | 2017                   | What influences environmental entrepreneurship? A multilevel analysis of the determinants of entrepreneurs' environmental orientation          | Environmental           | Objective constraints created by formal institutions                                                                           | Institutions constraining sustainability-oriented enterprise                                          | S-macro                        | Implicit                         |
|     |                                                   |                        |                                                                                                                                                |                         | Supportive social context                                                                                                      | Social networks encouraging sustainability-oriented enterprise                                        | S-meso                         | Implicit                         |
| 159 | Muñoz, P.; Cohen, B.                              | 2017                   | Towards a social-ecological understanding of sustainable venturing                                                                             | Sustainable             | Socio-ecological embeddedness                                                                                                  | Developing venture with sustainability values at the core                                             | AF-micro                       | Implicit                         |
|     |                                                   |                        |                                                                                                                                                |                         | Entrepreneurial synchronicity                                                                                                  | Discovering sustainability-oriented opportunities                                                     | AF-micro                       | Explicit                         |
| 160 | Muñoz, P.; Cohen, B.                              | 2017<br>(Online First) | Sustainable Entrepreneurship Research: Taking Stock and looking ahead                                                                          | Sustainable             | Imperfect markets connected with social and environmental degradation                                                          | Market failure causing environmental and social impairment                                            | S-meso                         | Explicit                         |
|     |                                                   |                        |                                                                                                                                                |                         | Establishing a transformative mindset                                                                                          | Discovering sustainability-oriented opportunities                                                     | AF-micro                       | Implicit                         |
|     |                                                   |                        |                                                                                                                                                |                         | Seeking to change current institutions                                                                                         | Creating sustainability-oriented institutions                                                         | AF-micro                       | Implicit                         |
|     |                                                   |                        |                                                                                                                                                |                         | Creating sustainable local enterprise networks                                                                                 | Creating sustainability-oriented networks                                                             | T-meso                         | Implicit                         |
| 161 | Stubbs, W.                                        | 2017                   | Sustainable Entrepreneurship and B Corps                                                                                                       | Sustainable             | Tensions are solved via firm-level hybridization mechanisms                                                                    | Managing tensions in hybrid firms                                                                     | AF-micro                       | Explicit                         |
|     |                                                   |                        |                                                                                                                                                |                         | Emergence of market-level logics                                                                                               | Logic hybridization leading to field-level change                                                     | AF-meso                        | Implicit                         |
